# Supplementary material
Source: publisher figshare collection journal article supplement (https://karger.figshare.com/ndownloader/files/17785340)
Supplement: Supplementary file 1 [file 17785340]

## Supplementary Material: Appendix 2 – Results: Local histopathological and mutational analyses

The results of the local histopathological and mutational analyses are shown in Supplementary Table S2; a total of 300 samples (100%) were available for analysis.

**Supplementary Table S2** Summary of findings from local histopathological and mutational analyses

| Local histopathological analysis, <i>n</i> (%)                |           | <i>n</i> = 300 |
|---------------------------------------------------------------|-----------|----------------|
| Samples available and analysed                                |           | 300 (100)      |
| c-KIT positive (GIST confirmed; immunohistochemical analysis) |           | 245 (82)       |
| Analysis missing                                              |           | 31 (10)        |
| <i>c-KIT</i> mutational status                                | Exon 9    | 8 (3)          |
|                                                               | Exon 11   | 74 (30)        |
|                                                               | Exon 13   | 0 (0)          |
|                                                               | Exon 17   | 5 (2)          |
|                                                               | Wild type | 2 (1)          |
|                                                               | Unknown   | 139 (57)       |
| c-KIT positivity missing data                                 |           | 2 (1)          |
| c-KIT negative                                                |           | 24 (8)         |
| <i>PDGFRAα</i> mutational status                              | Exon 12   | 2 (1)          |
|                                                               | Exon 18   | 12 (4)         |
| Multiple loci mutations                                       |           | 15 (5)         |

Percentages may not add up to 100 due to rounding

### Discussion and conclusions: Local histopathological and mutational analyses

Overall, local histopathological and mutation analyses performed in this study showed that the majority of the GIST samples (82%) were c-KIT positive; 8% of the GIST samples were c-KIT negative. The remaining 10% of results were not reported. These findings are in line with published reports of KIT mutations being present in most (>70%) of GISTs [1-3].

With regard to the frequency of specific KIT mutations in GIST samples in the present study, findings from local analysis tend to differ from published reports. The finding of 3% exon 9 mutations, for example, is slightly lower than the published range of 4–17%, while the finding of 30%

exon 11 mutations is much lower than the published range of 57–77% [3]. However, the frequency of mutations in exons 13 and 17 (0–2%) is in line with published reports of these mutations being rare (<2%) [2]. Also, similar to published reports, a small percentage of KIT-negative GISTs with PDGFRA $\alpha$  mutations were found (1–4%) [2].

## References

1. Tosoni A, Nicolardi L, Brandes AA (2004) Current clinical management of gastrointestinal stromal tumors. *Expert Rev Anticancer Ther* 4:595–605
2. Corless CL, Fletcher JA, Heinrich M (2004) Biology of gastrointestinal stromal tumors. *J Clin Oncol* 22:3813–3825
3. Heinrich MC, Blanke CD, Druker BJ, Corless CL (2002) Inhibition of KIT tyrosine kinase activity: a novel molecular approach to the treatment of KIT-positive malignancies. *J Clin Oncol* 20:1692–1703
